# Supplementary material
Source: PubMed Central journal article supplement (PMC2597460)
Supplement: NIHMS64827-supplement-1si20051101_12.pdf [file NIHMS64827-supplement-1si20051101_12.pdf]

## Supporting Information:

### Semi-Rational Design of Dual Acting

#### A<sub>1</sub> and A<sub>3</sub> Adenosine Receptor Agonists for Cardioprotection

Kenneth A. Jacobson, Zhan-Guo Gao, Susanna Tchilibon, Heng T. Duong,

Bhalchandra V. Joshi, Dmitry Sonin, Bruce T. Liang

#### Ligand design

The selection of the *N*<sup>6</sup>-substituents to achieve equipotency at A<sub>1</sub> and A<sub>3</sub> ARs was based on cumulative SAR data for adenosine derivatives binding to human and rat ARs.<sup>21,23,24</sup> Representative and illustrative examples of *N*<sup>6</sup>-monosubstituted adenine-9-ribose derivatives are given in Table 3. The affinity at the A<sub>3</sub> AR is more variable depending on species than the affinity at the A<sub>1</sub> and A<sub>2A</sub> ARs.

#### Synthetic approach

The synthetic scheme for the preparation of the nucleosides **2** and **3** from the key intermediate **7**, prepared in 8 steps from  $\gamma$ -erythronolactone,<sup>21,25</sup> is shown in Scheme 1A. The amine precursor **15** for the 7-norbornyl derivative **3** was synthesized as shown in Scheme 1B by a Curtius rearrangement of the acyl azide.

**Table 3**

Species Differences in Affinity at A<sub>3</sub>AR Are More Pronounced than at A<sub>1</sub> or A<sub>2A</sub>AR

|                                               | 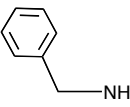 |  |  |  |  |
|-----------------------------------------------|-----------------------------------------------------------------------------------|-----------------------------------------------------------------------------------|-----------------------------------------------------------------------------------|-------------------------------------------------------------------------------------|-------------------------------------------------------------------------------------|
| <i>N</i> <sup>6</sup> -Substituted Adenosine: | Benzyl                                                                            | 2-Phenylethyl                                                                     | (1S,2R)2-Phenyl-1-cyclopropyl                                                     | Cyclopentyl                                                                         | 7-Norbornyl                                                                         |
| K <sub>i</sub> (nM):                          |                                                                                   |                                                                                   |                                                                                   |                                                                                     |                                                                                     |
| Rat A <sub>1</sub>                            | 175                                                                               | 24                                                                                | 12                                                                                | 0.45                                                                                | 0.48                                                                                |
| Human A <sub>1</sub>                          | 78                                                                                | 13                                                                                | 30                                                                                | 1.8                                                                                 |                                                                                     |
| Rat A <sub>3</sub>                            | 120                                                                               | 240                                                                               | 694                                                                               | 240                                                                                 | 229                                                                                 |
| Human A <sub>3</sub>                          | 41                                                                                | 2.1                                                                               | 0.63                                                                              | 70                                                                                  | 112                                                                                 |
| Rat A <sub>2A</sub>                           | 285                                                                               | 161                                                                               | 560                                                                               | 462                                                                                 | >10,000                                                                             |
| Human A <sub>2A</sub>                         | 2180                                                                              | 676                                                                               | 2250                                                                              | 820                                                                                 |                                                                                     |

Values are from references 23, 24, 38.

**Scheme 2** (below). Synthetic route to three adenosine agonists **1** - **3** that were designed for high affinity at the A<sub>1</sub> and A<sub>3</sub> adenosine receptors and low affinity at the A<sub>2</sub> receptors. Both **2** and **3** contain the 2-chloro and 5'-uronamido-(N)-methanocarba substituents. In (A) the 2,6-dichloro 5'-ester **7** was treated first with a cycloalkylamine, which displaced selectively at the 6-position and subsequently with methylamine in excess, which displaced at the ester group to yield **10** and **11**. The final step was deprotection of the isopropylidene protecting group at the 2',3'-hydroxyl groups. The 2-Cl group of **2** was also hydrogenolyzed to give **1**. (B) outlines the preparation of the precursor 7-norbornylamine **15** in three steps from 7-norbornyl bromide using a Curtius

rearrangement. Reagents: a) RNH<sub>2</sub>, MeOH, triethylamine; b) CH<sub>3</sub>NH<sub>2</sub>, MeOH; c) TFA, MeOH, 70°C; d) 10% Pd/C/ H<sub>2</sub>, MeOH; e) LDBB, CO<sub>2</sub>; f) NaN<sub>3</sub>, ethyl chloroformate; g) 90°C; h) *t*-BuOH; i) HCl, dioxane.

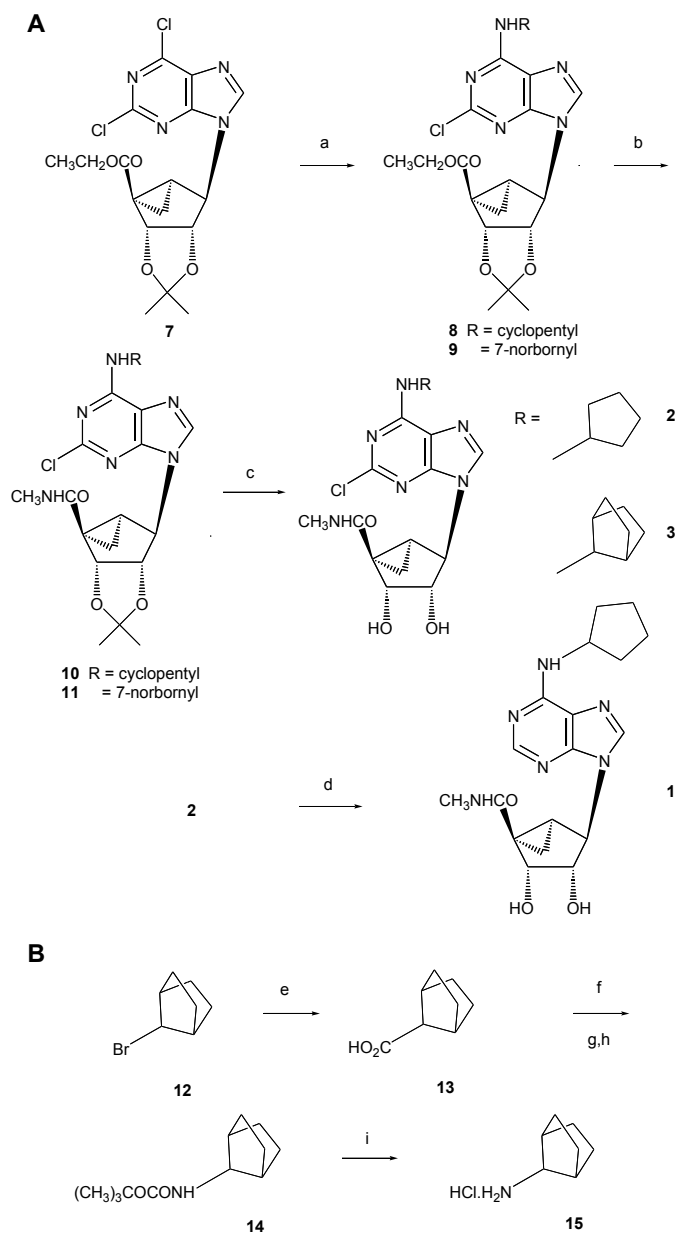

## Chemical synthesis

**Materials and instrumentation.** Reagents and solvents were purchased from Sigma-Aldrich (St. Louis, MO). <sup>1</sup>H NMR spectra were obtained with a Varian Gemini

300 spectrometer using CDCl<sub>3</sub>, D<sub>2</sub>O, CD<sub>3</sub>OD or DMSO-d<sub>6</sub> as solvents. Chemical shifts were expressed as ppm downfield from TMS. All melting points were determined with a Thomas-Hoover apparatus (A. H. Thomas Co.) and are uncorrected.

Purity of compounds was determined using a Hewlett–Packard 1100 HPLC equipped with a Luna 5 μ RP-C18(2) analytical column (250 X 4.6 mm; Phenomenex, Torrance, CA). System A parameters consisted of the following: linear gradient solvent system of H<sub>2</sub>O/CH<sub>3</sub>CN from 95/5 to 20/80 in 20 min; flow rate of 1 mL/min. System B parameters consisted of the following: linear gradient solvent system of 5 mM TBAP/CH<sub>3</sub>CN from 80/20 to 20/80 in 20 min, then isocratic for 2 min; flow rate of 1 mL/min. Peaks were detected by UV absorption with a diode array detector. All derivatives tested for biological activity showed 96% or greater purity in the HPLC systems.

TLC analysis was carried out on aluminum sheets precoated with silica gel F<sub>254</sub> (0.2 mm) from Aldrich. Low-resolution mass spectrometry was performed with a JEOL SX102 spectrometer with 6-kV Xe atoms following desorption from a glycerol matrix or on an Agilent LC/MS 1100, 1100 MSD, with a Waters Atlantis C18 column.

**(1'S, 2'R, 3'S, 4'S, 5'S)-4'-[6-(cyclopentylamino)-2-chloro-purin-9-yl]-2',3'-O-isopropylidene-bicyclo[3.1.0]hexane-1'-carboxylic acid ethyl ester (8).**

Cyclopentylamine hydrochloride (**15**) (45.5 mg, 0.53 mmol) was added to a solution of **7** (45 mg, 0.11 mmol) and triethylamine (1 mL) in methanol (3 mL). The mixture was stirred at room temperature for 3 h. Then it was concentrated *in vacuo* to dryness and the residue was purified by PTLC (chloroform/methanol 20:1) to give **8** (43 mg, 85%).

$^1\text{H}$  NMR ( $\text{CDCl}_3$ , 300 MHz)  $\delta$  7.64 (s, 1H), 5.95 (br s, 1H), 5.87 (d,  $J=7.2$  Hz, 1H), 5.37 (d,  $J=6.6$  Hz, 1H), 4.85 (s, 1H), 4.72 (d,  $J=6.9$  Hz, 1H), 4.62-4.51 (m, 2H), 2.60-2.43 (m, 2H), 2.23-2.10 (m, 4H), 1.79-1.70 (m, 5H), 1.56 (s, 3H), 1.35 (t,  $J=7.8$ , 3H), 1.32-1.24 (m, 6H). MS ( $m/e$ ) (positive API-ES) 462.1 ( $\text{M}+\text{H}$ ) $^+$ .

**(1'S, 2'R, 3'S, 4'S, 5'S)-4'-[6-(bicyclo[2.2.1]hept-7-yl-amino)-2-chloro-purin-9-yl]-2',3'-O-isopropylidene-bicyclo[3.1.0]hexane-1'-carboxylic acid ethyl ester (9).**

$^1\text{H}$  NMR ( $\text{CDCl}_3$ , 300 MHz)  $\delta$  7.64 (s, 1H), 5.87 (m, 2H), 4.85 (s, 1H), 4.72 (d,  $J=6.9$  Hz, 1H), 4.32-4.12 (m, 2H), 3.74-3.68 (m, 1H), 3.48 (d,  $J=4.5$  Hz, 1H), 2.32-2.25 (br s, 2H), 2.23-2.15 (m, 1H), 1.18-1.67 (m, 4H), 1.63 (s, 3H), 1.55 (s, 3H), 1.41-1.22 (m, 7H). MS ( $m/e$ ) (positive API-ES) 488.2 ( $\text{M}+\text{H}$ ) $^+$ .

**(1'S, 2'R, 3'S, 4'S, 5'S)-4'-[6-(cyclopentylamino)-2-chloro-purin-9-yl]-2',3'-O-isopropylidene-bicyclo[3.1.0]hexane-1'-carboxylic acid methyl amide (10).** The ester **3a** (35 mg, 0.07 mmol) was dissolved in methanol (3 mL) and treated with an aqueous solution of methylamine (1 mL, 40%). This mixture was stirred at room temperature overnight, then the solvent was evaporated to dryness, and the white residue was purified by PTLC (chloroform/methanol 9:1) to give the uronamide **10** (15.6 mg, 50%).  $^1\text{H}$  NMR ( $\text{CDCl}_3$ , 300 MHz)  $\delta$  7.68 (s, 1H), 6.97 (br s, 1H), 6.02 (br s, 1H), 5.67 (d,  $J=7.8$  Hz, 1H), 4.79-4.76 (m, 2H), 4.61-4.54 (m, 1H), 2.91 (d,  $J=5.1$  Hz, 3H), 2.17-2.11 (m, 2H), 2.04-1.81 (m, 2H), 1.78-1.65 (m, 5H), 1.58-1.48 (m, 5H), 1.27 (s, 3H). MS ( $m/e$ ) (positive API-ES) 447.2 ( $\text{M}+1$ ) $^+$ .

**(1'S, 2'R, 3'S, 4'S, 5'S)-4'-[6-(bicyclo[2.2.1]hept-7-yl-amino)-2-chloro-purin-9-yl]-2',3'-O-isopropylidene-bicyclo[3.1.0]hexane-1'-carboxylic acid methyl amide (11).**

<sup>1</sup>H NMR (CDCl<sub>3</sub>, 300 MHz) δ 7.68 (s, 1H), 6.97 (br s, 1H), 6.01 (br s, 1H), 5.66 (d, J= 7.8 Hz, 1H), 4.14 (br s, 1H), 4.79-4.76 (m, 2H), 2.91 (d, J= 5.1 Hz, 3H), 2.31 (br s, 2H), 2.04-1.99 (m, 1H), 1.81-1.64 (m, 7H), 1.55 (s, 3H), 1.40 (d, J= 8.4 Hz, 3H), 1.27 (m, 4H). MS (*m/e*) (positive API-ES) 473.2 (M+1)<sup>+</sup>.

**(1'S, 2'R, 3'S, 4'S, 5'S)-4'-[6-(cyclopentylamino)-2-chloro-purin-9-yl]-2',3'-dihydroxy-bicyclo[3.1.0]hexane-1'-carboxylic acid methyl amide (2).**

**10** (14 mg, 0.03 mmol) was treated with a solution of trifluoroacetic acid in MeOH (5 mL, 10%) and H<sub>2</sub>O (0.5 mL), and the mixture was heated at 70<sup>0</sup>C for 3 h. The solution was cooled and the solvent removed to dryness by coevaporation with toluene *in vacuo*. The white residue was purified by PTLC (chloroform/methanol 9:1) to give the final product **2** (10.1 mg, 80%). <sup>1</sup>H NMR (CDCl<sub>3</sub>, 300 MHz) δ 7.81 (s, 1H), 6.96 (br s, 1H), 6.19 (br s, 1H), 5.06 (br s, 1H), 4.88 (br s, 1H), 4.80 (s, 1H), 4.61-4.48 (m, 1H), 4.07 (d, J= 6.6 Hz, 1H), 3.62 (m, 1H), 2.91 (d, J= 4.8 Hz, 3H), 2.58-2.10 (m, 7H), 1.77-1.53 (m, 4H). MS (*m/e*) (positive API-ES) 407.1 (M+1)<sup>+</sup>. HRMS (M + Na)<sup>+</sup>: calculated 429.1418; found 429.1397. HPLC: (System A) 12.9 min (97%); (System B), 11.6 min (99%).

**(1'S, 2'R, 3'S, 4'S, 5'S)-4'-[6-(bicyclo[2.2.1]hept-7-yl-amino)-2-chloro-purin-9-yl]-2',3'-dihydroxy-bicyclo[3.1.0]hexane-1'-carboxylic acid methyl amide (3).**

$^1\text{H}$  NMR ( $\text{CDCl}_3$ , 300 MHz)  $\delta$  7.81 (s, 1H), 6.96 (br s, 1H), 6.15 (br s, 1H), 5.05 (br s, 1H), 4.88 (br s, 1H), 4.79 (s, 1H), 4.13-4.06 (m, 2H), 3.60 (br s, 1H), 2.90 (d,  $J=4.8$  Hz, 3H), 2.31-2.15 (m, 6H), 1.41-1.22 (m, 5H). MS ( $m/e$ ) (positive API-ES) 433.2 ( $M+1$ ) $^+$ . HRMS ( $M + \text{Na}$ ) $^+$ : calculated 455.1474; found 455.1554. HPLC: (System A) 14.2 min (97%); (System B), 14.2 min (98%).

**(1'S, 2'R, 3'S, 4'S, 5'S)-4'-[6-(cyclopentylamino)-purin-9-yl]-2',3'-dihydroxy-bicyclo[3.1.0]hexane-1'-carboxylic acid methyl amide (1).**

Compound **5** (5 mg, 0.007 mmol) in MeOH (5 mL) and 10% Pd/C (0.5 mg) were placed in a 250 mL pressure bottle, that was evacuated with a water-aspirator and then filled with 20 psi of hydrogen. The mixture was shaken for 15 h, the catalyst was filtered, and the solution was concentrated *in vacuo* to dryness. The residue was purified by PTLC (chloroform/methanol 10:1) to give the pure product **1** (2.1 mg, 80%).  $^1\text{H}$  NMR ( $\text{CDCl}_3$ , 300 MHz)  $\delta$  8.30 (s, 1H), 7.86 (s, 1H), 6.82 (br s, 1H), 5.87 (br s, 1H), 4.90 (s, 1H), 4.79 (d,  $J=6.6$  Hz, 1H), 4.07 (d,  $J=6.6$  Hz, 1H), 3.65 (m, 3H), 2.92 (d,  $J=4.8$  Hz, 3H), 2.38-2.33 (m, 1H), 2.18-2.11 (m, 2H), 1.77-1.59 (m, 4H), 1.36-1.26 (m, 2H), 0.95-0.86 (m, 2H). HRMS ( $M+1$ ) $^+$ : calculated 373.1988, found 373.1994. HPLC: (System A) 9.8 min (96%); (System B), 6.6 min (97%).

**Bicyclo[2.2.1]heptane-7-carboxylic acid (13).** Several pieces of lithium metal (49 mg, 7 mmol), previously scraped under THF to remove any oxide and nitride from its surface, were added under nitrogen to a solution of DBB (1.67 g, 6.28 mmol) in THF (10 mL). The mixture was then cooled to  $0^\circ\text{C}$ , and the blue-green color of the radical

anion solution appeared within 30 min. After 3 h all the lithium had reacted. This dark green solution of lithium 4,4'-di-*t*-butylbiphenylide (LDBB) was added under nitrogen, through a cannula, to a solution of 7-bromonorbornane (**12**) (600 mg, 3.42 mmol) in THF (3 mL), cooled to  $-78^{\circ}\text{C}$ . During the addition of the LDBB solution, the reaction was first colorless and then turned red. This red solution was stirred for additional 30 min at  $-78^{\circ}\text{C}$  and then quickly poured on freshly crushed dry  $\text{CO}_2$ . The resulting light yellow solution was allowed to warm to room temperature and the THF was removed under reduced pressure.  $\text{Et}_2\text{O}$  (20 mL) was added and the organic layer was extracted with 1M aqueous NaOH (15 mL x 2). The combined aqueous extracts were acidified by concentrated HCl and extracted with  $\text{Et}_2\text{O}$  (10 mL x 3). The combined organic solutions were washed with water and brine, dried over  $\text{Na}_2\text{SO}_4$ , filtered and concentrated *in vacuo*, to give **13** as a white solid (320 mg, 67% yield).  $^1\text{H}$  NMR ( $\text{CDCl}_3$ , 300 MHz)  $\delta$  2.48 (s, 3H), 1.82 (d,  $J = 8.4$  Hz, 2H), 1.63 (d,  $J = 8.4$  Hz, 2H), 1.29- 1.25 (m, 4H).

**Bicyclo[2.2.1]hept-7-yl-carbamic acid *tert*-butyl ester (14).** A mixture of **13** (290 mg, 2.1 mmol), triethylamine (0.4 mL, 2.8 mmol), and ethyl chloroformate (0.3 mL, 3.1 mmol) in dry acetone (3.6 mL) was stirred at  $-10^{\circ}\text{C}$  for 3 h. Then a solution of  $\text{NaN}_3$  (224 mg, 3.4 mmol) in  $\text{H}_2\text{O}$  (1.5 mL) was added and the mixture was stirred for additional 1.5 h.  $\text{H}_2\text{O}$  (10 mL) was added and the solution was concentrated and extracted with toluene (10 mL x 3). The combined organic layers were dried over  $\text{Na}_2\text{SO}_4$ , filtered and concentrated to about 50% to remove remaining traces of water. The resulting solution was heated at  $90^{\circ}\text{C}$  until the evolution of nitrogen ceased (2 h)



and the toluene evaporated. The resulting isocyanate was dissolved in dry *t*-BuOH (10 mL) and the solution was refluxed for 20 h. The reaction mixture was concentrated and the crude *t*-butyl carbamate was purified by a flash chromatography on a column using ethyl acetate/ petroleum ether (1/8) to give **14** as a pure compound (217 mg, 50% yield). <sup>1</sup>H NMR (CDCl<sub>3</sub>, 300 MHz) δ 4.48 (br s, 1H), 3.58 (br s, 1H), 2.09 (s, 2H), 1.72-1.61 (m, 4H), 1.45 (s, 9H), 1.30 (d, J = 8.4 Hz, 2H), 1.19 (d, J = 8.4 Hz, 2H). MS (m/e) positive API-ES) 212 (M+1)<sup>+</sup>.

**Bicyclo[2.2.1]hept-7-yl-ammonium chloride (15).** Dry HCl in dioxane (2 mL, 4N) was added to **14** (150 mg, 0.7 mmol) and the mixture stirred for 0.5 h. The dioxane was evaporated, Et<sub>2</sub>O was added, and the suspension was filtered. The filtrate washed with Et<sub>2</sub>O to give **15** as a white solid (82 mg, 78% yield). <sup>1</sup>H NMR (D<sub>2</sub>O, 300 MHz) δ 3.29 (s, 1H), 2.29 (br s, 2H), 1.74-1.66 (m, 4H), 1.50 (d, J = 7.5 Hz, 2H), 1.19 (d, J = 7.5 Hz, 2H).

### Receptor binding and functional assays

[<sup>125</sup>I]*N*<sup>6</sup>-(4-amino-3-iodobenzyl)adenosine-5'-*N*-methyluronamide (I-AB-MECA; 2000 Ci/mmol), [<sup>3</sup>H]cyclic AMP (40 Ci/mmol), and other radioligands were from GE Healthcare (Piscataway, NJ). [<sup>3</sup>H]CCPA (2-chloro-*N*<sup>6</sup>-cyclopentyladenosine) was a custom synthesis product.

### Cell culture and membrane preparation

CHO (Chinese hamster ovary) cells expressing recombinant the human A<sub>3</sub>AR were cultured in DMEM (Dulbecco's modified Eagle's medium) supplemented with 10% fetal

bovine serum, 100 units/mL penicillin, 100 µg/mL streptomycin, 2 µmol/mL glutamine and 800 µg/mL geneticin. The CHO cells expressing rat A<sub>3</sub>ARs were cultured in DMEM and F12 (1:1). Cells were harvested by trypsinization. After homogenization and suspension, cells were centrifuged at 500 g for 10 min, and the pellet was re-suspended in 50 mM Tris·HCl buffer (pH 8.0) containing 10 mM MgCl<sub>2</sub>, 1 mM EDTA and 0.1 mg/mL CHAPS (3[(3-cholamidopropyl)dimethylammonio]-propanesulfonic acid). The suspension was homogenized with an electric homogenizer for 10 sec, and was then re-centrifuged at 20,000 g for 20 min at 4°C. The resultant pellets were resuspended in buffer in the presence of 3 Units/mL adenosine deaminase, and the suspension was stored at -80°C until the binding experiments. The protein concentration was measured using the Bradford assay.<sup>37</sup>

#### Binding assays at the A<sub>1</sub> and A<sub>2A</sub> receptors

For binding to rat A<sub>1</sub> receptors,<sup>24</sup> the radioligand [<sup>3</sup>H]CCPA (0.5 nM) was incubated with rat brain membranes as described. For binding to human A<sub>1</sub> receptors,<sup>23</sup> [<sup>3</sup>H]R-PIA (*N*<sup>6</sup>-[(R)-phenylisopropyl]adenosine, 2 nM) was incubated with membranes (40 µg/tube) from CHO cells stably expressing human A<sub>1</sub> receptors at 25°C for 60 min in 50 mM Tris·HCl buffer (pH 7.4; MgCl<sub>2</sub>, 10 mM) in a total assay volume of 200 µl. Nonspecific binding was determined using 10 µM of CPA (*N*<sup>6</sup>-cyclopentyladenosine). For human A<sub>2A</sub> receptor binding,<sup>22</sup> membranes (20 µg/tube) from HEK-293 cells stably expressing human A<sub>2A</sub> receptors were incubated with [<sup>3</sup>H]CGS21680 (2-[p-(2-carboxyethyl)phenyl]-ethylamino]-5'-*N*-ethylcarboxamido-adenosine, 15 nM) at 25°C for 60 min in 200 µl 50 mM Tris·HCl, pH 7.4, containing 10 mM MgCl<sub>2</sub>. NECA (10 µM) was used to define nonspecific binding. Reaction was terminated by filtration with GF/B filters.

### Binding assay at the human $A_3$ receptor

For competitive binding assay, each tube contained 50  $\mu$ L membrane suspension (20  $\mu$ g protein), 25  $\mu$ L of [ $^{125}$ I]-AB-MECA (1.0 nM), and 25  $\mu$ L of increasing concentrations of the test ligands in Tris·HCl buffer (50 mM, pH 8.0) containing 10 mM MgCl<sub>2</sub>, 1 mM EDTA. Nonspecific binding was determined using 10  $\mu$ M of Cl-IB-MECA in the buffer. The mixtures were incubated at 37°C for 60 min. Binding reactions were terminated by filtration through Whatman GF/B filters under reduced pressure using a MT-24 cell harvester (Brandell, Gaithersburgh, MD, USA). Filters were washed three times with 9 mL ice-cold buffer. Radioactivity was determined in a Beckman 5500B  $\gamma$ -counter. IC<sub>50</sub> values were converted to K<sub>i</sub> values as described.<sup>17</sup>

### Cyclic AMP accumulation assay

Intracellular cyclic AMP levels were measured with a competitive protein binding method.<sup>18,19</sup> CHO cell that expressed recombinant the human or rat A<sub>3</sub>AR or the human A<sub>1</sub> or A<sub>2B</sub>AR were harvested by trypsinization. After centrifugation and resuspended in medium, cells were planted in 24-well plates in 1.0 mL medium. After 24 h, the medium was removed and cells were washed three times with 1 mL DMEM, containing 50 mM HEPES, pH 7.4. Cells were then treated with agonists and/or test compounds in the presence of rolipram (10  $\mu$ M) and adenosine deaminase (3 units/mL). After 45 min forskolin (10  $\mu$ M) was added to the medium, and incubation was continued an additional 15 min. The reaction was terminated by removing the supernatant, and cells were lysed upon the addition of 200  $\mu$ L of 0.1 M ice-cold HCl. The cell lysate was resuspended and stored at -20°C. For determination of cyclic AMP production, protein kinase A (PKA) was incubated with [ $^3$ H]cyclic AMP (2 nM) in K<sub>2</sub>HPO<sub>4</sub>/EDTA buffer (K<sub>2</sub>HPO<sub>4</sub>, 150

mM; EDTA, 10 mM), 20  $\mu$ L of the cell lysate, and 30  $\mu$ L 0.1 M HCl or 50  $\mu$ L of cyclic AMP solution (0-16 pmol/200  $\mu$ L for standard curve). Bound radioactivity was separated by rapid filtration through Whatman GF/C filters and washed once with cold buffer. Bound radioactivity was measured by liquid scintillation spectrometry. Concentration response curves by for inhibition of cyclic AMP formation compound **2** are given in Figure 3.

### **Anti-ischemic Cardioprotection**

Langendorff perfusion of the mouse hearts was carried out as previously described.<sup>27,30,34-36</sup> Mice were anesthetized with 60 mg/kg sodium pentobarbital (i.p.), and heart excised in ice-cold perfusion buffer.<sup>8,13,27</sup> The aorta was cannulated and retrograde perfused in the Langendorff mode at a pressure of 55 mmHg. To assess isovolumic function, fluid-filled polyvinyl plastic film balloons were inserted into the left ventricle via the left atrium. Balloons were connected to a fluid-filled pressure transducer to measure the left ventricular developed pressure (LVDP), +dP/dt, -dP/dt, and heart rate. To induce normothermic global ischemia and reperfusion, retrograde perfusion of the aorta was stopped, and hearts were immersed in the same perfusion buffer in a water-jacketed bath maintained at 37°C. After 35-min ischemia and 30-min reperfusion, the recovery of left ventricular function was determined by quantifying the LVDP, +dP/dt, and -dP/dt. To quantify the infarct, the hearts were retrograde perfused with 1% triphenyltetrazolium chloride (TTC) in perfusion buffer for 10 minutes after 120-min reperfusion, which allowed washout of pyridine nucleotides from necrotic cells as required for TTC staining.<sup>30</sup> The heart was then immersed in the same TTC buffer for

another 10 minutes. The hearts were frozen, cut into six or seven 1 mm slices from apex to base, and scanned for measurement of infarct size by computer morphometry (Image-Pro Plus, version 5.0, Media Cybernetics, Inc, Silver Spring, MD).<sup>26</sup> The infarct size was quantified as the area of necrosis normalized to the total ventricular area. To assess the anti-ischemic cardioprotective effect of adenosine receptor agonists, vehicle (0.1% DMSO in perfusion buffer), or compound **2** (30 nM) or compound **5** (100 nM) dissolved in DMSO and diluted in buffer were administered in Langendorff mode for five minutes prior to the normothermic global ischemia/reperfusion.

## References

1. Fredholm, B. B.; IJzerman, A. P.; Jacobson, K. A.; Klotz, K-N.; Linden, J. International Union of Pharmacology. XXV. Nomenclature and classification of adenosine receptors. *Pharmacol. Rev.* **2001**, *53*, 527–552.
2. Yao, L.; Burbiel, J.C.; Maass, A.; Müller, C.E. Adenosine receptor agonists: from basic medicinal chemistry to clinical development. *Expert Opin. Emerging Drugs.* **2003**, *8*, 537-576.
3. Liu, G.S.; Richards S.C.; Olsson, R.A.; Mullane, K.; Walsh, R.S.; Downey, J.M. Evidence that the adenosine A<sub>3</sub> receptor may mediate the protection afforded by preconditioning in the isolated rabbit heart. *Cardiovasc. Res.* **1994**, *28*, 1057-1061.
4. Liang, B.T.; Jacobson, K.A. A physiological role of the adenosine A<sub>3</sub> receptor: sustained cardioprotection, *Proc. Natl. Acad. Sci. USA* **1998**, *95*, 6995-6999.
5. Tracey, W. R.; Magee, W. P.; Oleynek, J. J.; Hill, R. J.; Smith, A. H.; Flynn, D. M.; Knight, D. R. Novel N<sup>6</sup>-substituted adenosine 5'-N-methyluronamides with high selectivity for human adenosine A<sub>3</sub> receptors reduce ischemic myocardial injury. *Am. J. Physiol. Heart Circ. Physiol.* **2003**, *285*, H2780.
6. Peart, J.; Flood, A.; Linden, J.; Matherne, G.P.; Headrick, J.P. Adenosine-mediated cardioprotection in ischemic-reperfused mouse heart. *J Cardiovasc Pharmacol.* **2002**, *39*, 117-129.
7. Maddock, H.L.; Mocanu, M.M.; and Yellon, D.M. Adenosine A<sub>3</sub> receptor activation protects the myocardium from reperfusion/reoxygenation injury. *Am J Physiol Heart Circ Physiol* **2002**, *283*, H1307–H1313.
8. Cross, H.R.; Murphy, E.; Black, R.G.; Auchampach, J.; Steenbergen, C. Overexpression of A<sub>3</sub> adenosine receptors decreases heart rate, preserves energetics, and protects ischemic hearts. *Am. J. Physiol. Heart Circ. Physiol.* **2002**, *283*, H1562-1568.
9. Parsons, M.; Young, L.; Lee, J.-E.; Jacobson, K.A.; Liang, B.T. Distinct cardioprotective effects of adenosine mediated by differential coupling of receptor subtypes to phospholipases C and D. *FASEB J.* **2000**, *14*, 1423-1431.
10. Shneyvays, V.; Leshem, D.; Zinman, T.; Mamedova, L.K.; Jacobson, K.A.; Shainberg, A. Role of adenosine A<sub>1</sub> and A<sub>3</sub> receptors in regulation of cardiomyocyte

- homeostasis after mitochondrial respiratory chain injury, *Am. J. Physiol. Heart Circ. Physiol.* **2005**, *288*, H2792-H2801.
11. Carr, C.S.; Hill, R.J.; Masamune, H.; Kennedy, S.P.; Knight, D.R.; Tracey, W.R.; Yellon, D.M. Evidence for a role for both the adenosine A<sub>1</sub> and A<sub>3</sub> receptors in protection of isolated human atrial muscle against simulated ischaemia. *Cardiovasc. Res.* **1997**, *36*, 52–59.
  12. Kodani, E.; Bolli, R.; Tang, X.L.; Auchampach, J.A. Protection of IB-MECA against myocardial stunning in conscious rabbits is not mediated by the A<sub>1</sub> adenosine receptor. *Basic Res Cardiol.* **2001**, *96*, 487-96.
  13. Zhao, T.C.; Kukreja, R.C. Protein kinase C-delta mediates adenosine A<sub>3</sub> receptor-induced delayed cardioprotection in mouse. *Am. J. Physiol. Heart Circ. Physiol.* **2003**, *285*, H434-441.
  14. Fredholm, B.B.; Chen, J.F.; Cunha, R.A.; Svenningsson, P.; Vaugeois, J.M. Adenosine and brain function. *Int. Rev. Neurobiol.* **2005**, *63*, 191-270.
  15. von Lubitz, D.K.J.E.; Lin, R.-C.; Bischofberger, N.; Beenhakker, M.; Boyd, M.; Lipartowska, R.; Jacobson, K.A. Protection against ischemic damage by adenosine amine congener, a potent and selective adenosine A<sub>1</sub> receptor agonist, *Eur. J. Pharmacol.* **1999**, *369*, 313-317.
  16. Jacobson, K.A.; Xie, R.; Young, L.; Chang, L.; Liang, B.T. A novel pharmacological approach to treating cardiac ischemia: binary conjugates of A<sub>1</sub> and A<sub>3</sub> adenosine receptor agonists *J. Biol. Chem.* **2000**, *275*, 30272-30279.
  17. Baraldi, P.G.; Cacciari, B.; Pineda de las Infantas, M.J.; Romagnoli, R.; Spalluto, G.; Volpini, R.; Costanzi, S.; Vittori, S.; Cristalli, G.; Melman, N.; Park, K.-S.; Ji, X.-d.; Jacobson, K.A. Synthesis and biological activity of a new series of N<sup>6</sup>-arylcarbamoyl-, 2-(ar)alkynyl-N<sup>6</sup>-arylcarbamoyl, and N<sup>6</sup>-carboxamido- derivatives of adenosine-5'-N-ethyluronamide (NECA) as A<sub>1</sub> and A<sub>3</sub> adenosine receptor agonists. *J. Med. Chem.* **1998**, *41*, 3174-3185.
  18. van Tilburg, E.W.; van der Klein, P.A.M.; von Frijtag Drabbe Künzel, J.; de Groote, M.; Stannek, C.; Lorenzen, A.; IJzerman, AP. 2,5'-Disubstituted adenosine derivatives: evaluation of selectivity and efficacy for the adenosine A<sub>1</sub>, A<sub>2A</sub>, and A<sub>3</sub> receptor. *J. Med. Chem.* **2002**, *45*, 420-429.

19. Cappellacci, L.; Franchetti, P.; Pasqualini, M.; Petrelli, R.; Vita, P.; Lavecchia, A.; Novellino, E.; Costa, B.; Martini, C.; Klotz, K.N.; Grifantini, M. Synthesis, biological evaluation, and molecular modeling of ribose-modified adenosine analogues as adenosine receptor agonists. *J. Med. Chem.* **2005**, *48*, 1550-1562.
20. Lipinski, C.; Hopkins, A. Navigating chemical space for biology and medicine. *Nature* **2004**, *432*, 855-861.
21. Tchilibon, S.; Joshi, B.V.; Kim, S.K.; Duong, H.T.; Gao, Z.G.; Jacobson, K.A. (N)-Methanocarpa 2,*N*<sup>6</sup>-disubstituted adenine nucleosides as highly potent and selective A<sub>3</sub> adenosine receptor agonists. *J. Med. Chem.* **2005**, *48*, 1745-1758.
22. Gao, Z.G.; Kim, S.K.; Biadatti, T.; Chen, W.; Lee, K.; Barak, D.; Kim, S.G.; Johnson, C.R.; Jacobson, K.A. Structural determinants of A<sub>3</sub> adenosine receptor activation: Nucleoside ligands at the agonist/antagonist boundary. *J. Med. Chem.* **2002**, *45*, 4471-4484.
23. Gao, Z.G.; Blaustein, J.; Gross, A. S.; Melman, N.; Jacobson, K.A. *N*<sup>6</sup>-Substituted adenosine derivatives: Selectivity, efficacy, and species differences at A<sub>3</sub> adenosine receptors. *Biochem. Pharmacol.* **2003**, *65*, 1675-1684.
24. Tchilibon, S.; Kim, S.K.; Gao, Z.G.; Harris, B.A.; Blaustein, J.; Gross, A.S.; Melman, N.; Jacobson, K.A. Exploring distal regions of the A<sub>3</sub> adenosine receptor binding site: Sterically-constrained *N*<sup>6</sup>-(2-phenylethyl)adenosine derivatives as potent ligands. *Bioorg. Med. Chem.* **2004**, *12*, 2021-2034.
25. Joshi, B.V.; Moon, H.R.; Fettingner, J.C.; Marquez, V.E.; Jacobson, K.A. A new synthetic route to (N)-methanocarpa nucleosides designed as A<sub>3</sub> adenosine receptor agonists. *J. Org. Chem.* **2005**, *70*, 439-447.
26. Ichinose, F.; Bloch K.D.; Wu, J.C.; Hataishi, R.; Aretz, H.T.; Picard, M.H.; Scherrer-Crosbie, M. Pressure overload-induced LV hypertrophy and dysfunction in mice are exacerbated by congenital NOS3 deficiency. *Am. J. Physiol. Heart Circ. Physiology* **2004**, *286*, H1070-H1075.
27. Hinschen, A.K.; Rose'Meyer, R.B.; Headrick, J.P. Adenosine receptor subtypes mediating coronary vasodilation in rat hearts. *J Cardiovasc Pharmacol.* **2003**, *41*, 73-80.



28. Klotz, K.-N.; Hessling, J.; Hegler, J.; Owman, C.; Kull, B.; Fredholm, B.B.; Lohse, M.J. Comparative pharmacology of human adenosine receptor subtypes – characterization of stably transfected receptors in CHO cells. *Naunyn-Schmiedeberg's Arch. Pharmacol.* **1998**, *357*, 1-9.
29. van Galen, P.J.M.; van Bergen, A.H.; Gallo-Rodriguez, C.; Melman, N.; Olah, M.E.; IJzerman, A.P.; Stiles, G.L.; Jacobson, K.A. A binding site model and structure-activity relationships for the rat A<sub>3</sub> adenosine receptor. *Mol. Pharmacol.* **1994**, *45*, 1101-1111.
30. Gabel, S.A.; London, R.E.; Funk, C.D.; Steenbergen, C.; Murphy, E. Leukocyte-type 12-lipoxygenase-deficient mice show impaired ischemic preconditioning-induced cardioprotection. *Am. J. Physiol. Heart Circ. Physiol.* **2001**, *280*, H1963-1969.
31. Cheng, Y.-C.; Prusoff, W.H. Relationship between the inhibition constant (K<sub>i</sub>) and the concentration of inhibitor which causes 50 percent inhibition (I<sub>50</sub>) of an enzymatic reaction. *Biochem. Pharmacol.* **1973**, *22*, 3099-3108.
32. Nordstedt, C.; Fredholm, B.B. A modification of a protein-binding method for rapid quantification of cAMP in cell-culture supernatants and body fluid. *Anal. Biochem.* **1990**, *189*, 231-234.
33. Post SR.; Ostrom RS.; Insel PA. Biochemical methods for detection and measurement of cyclic AMP and adenylyl cyclase activity. *Methods Mol. Biol.* **2000**, *126*, 363-374.
34. Yang, A.; Sonin, D.; Jones, L.; Liang, B.T. A beneficial role of cardiac P2X<sub>4</sub> receptors in heart failure: Rescuing the calsequestrin-overexpression model of cardiomyopathy. *Am. J. Physiol.* **2004**, *287*, H1096-H1103.
35. Kuzume K, Kuzume K, Cao Z, Liu L, Van Winkle DM. Long-term infusion of Met5-enkephalin fails to protect murine hearts against ischemia-reperfusion injury. *Am J Physiol Heart Circ Physiol.* **2005**, *288*, H1717-1723.
36. Mei, Q.; Liang, B.T. Activation of P2 purinergic receptor enhances cardiac contractility in isolated perfused rat and mouse hearts. *Am. J. Physiol.* **2001**, *281*, H334-H341.
37. Bradford, M.M. A rapid and sensitive method for the quantitation of microgram quantities of protein utilizing the principle of protein-dye binding. *Anal. Biochem.* **1976**, *72*, 248-254.

38. Gao, Z.G.; Mamedova, L.; Chen, P.; Jacobson, K.A. 2-Substituted adenosine derivatives: Affinity and efficacy at four subtypes of human adenosine receptors. *Biochem. Pharmacol.* **2004**, *68*, 1985-1993.

Functional effects of Compound 2:

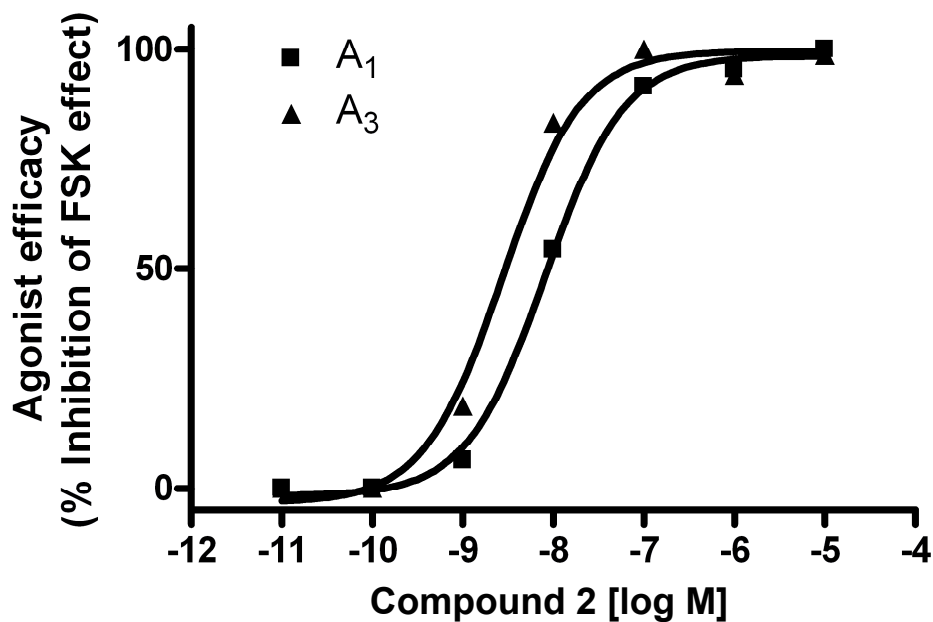

Figure 3. Inhibition of forskolin-stimulated cyclic AMP production induced by compound **2** in CHO cells stably transfected with the human A<sub>1</sub> (■) or A<sub>3</sub> (▲) AR. All experiments were performed in the presence of 10  $\mu$ M rolipram and 3 Units/ml adenosine deaminase. Forskolin (10  $\mu$ M) was used to stimulate cyclic AMP levels. The level of cAMP corresponding to 100% was  $220 \pm 30$  pmol/mL. The data shown were from one experiment performed in duplicate and are typical of two independent experiments giving similar results. EC<sub>50</sub> values were 8.2 and 2.8 nM at the A<sub>1</sub> or A<sub>3</sub> AR, respectively. 100% values are normalized to the maximal effect of NECA (10  $\mu$ M) as a full agonist at either the A<sub>1</sub> or A<sub>3</sub> AR.
